## RETRACTION

# Retraction: Calmodulin-binding transcription activator (CAMTA) genes family: Genome-wide survey and phylogenetic analysis in flax (*Linum usitatissimum*)

The *PLOS ONE* Editors

The *PLOS ONE* Editors retract this article [1] because it was identified as one of a series of submissions for which we have concerns about authorship, competing interests, and peer review. We regret that the issues were not addressed prior to the article's publication.

EA, MAR, MA, and PS did not agree with the retraction. MC, NH, ANS, MH and SAHB either did not respond directly or could not be reached.

## Reference

1. Ali E, Raza MA, Cai M, Hussain N, Shahzad AN, Hussain M, et al. (2020) Calmodulin-binding transcription activator (CAMTA) genes family: Genome-wide survey and phylogenetic analysis in flax (*Linum usitatissimum*). PLoS ONE 15(7): e0236454. <https://doi.org/10.1371/journal.pone.0236454>

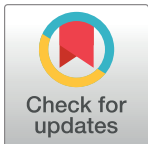

## OPEN ACCESS

**Citation:** The *PLOS ONE* Editors (2022) Retraction: Calmodulin-binding transcription activator (CAMTA) genes family: Genome-wide survey and phylogenetic analysis in flax (*Linum usitatissimum*). PLoS ONE 17(11): e0277638. <https://doi.org/10.1371/journal.pone.0277638>

**Published:** November 16, 2022

**Copyright:** © 2022 The PLOS ONE Editors. This is an open access article distributed under the terms of the [Creative Commons Attribution License](https://creativecommons.org/licenses/by/4.0/), which permits unrestricted use, distribution, and reproduction in any medium, provided the original author and source are credited.
